# Supplementary material for: Electron and energy transfer in a porphyrin–oxoporphyrinogen–fullerene triad, ZnP–OxP–C60
Source: Royal Society of Chemistry journal article supplement (doi:10.1039/d0cp02696d), 2020-01-01

## Supplementary Information

### Electron and energy transfer in a porphyrin-oxoporphyrinogen- fullerene triad, ZnP-OxP-C<sub>60</sub>

Mandeep K. Chahal, Habtom Gobese, Whitney A. Webre, Paul A. Karr, Daniel T. Payne, Katsuhiko Ariga,  
Francis D'Souza and Jonathan P. Hill

#### Contents

|                                                                     |    |
|---------------------------------------------------------------------|----|
| Synthesis summary.....                                              | S2 |
| Electronic spectra (treatment of OxP with NOBF <sub>4</sub> ) ..... | S3 |
| Chemical analysis spectra.....                                      | S4 |

### Synthesis Overview:

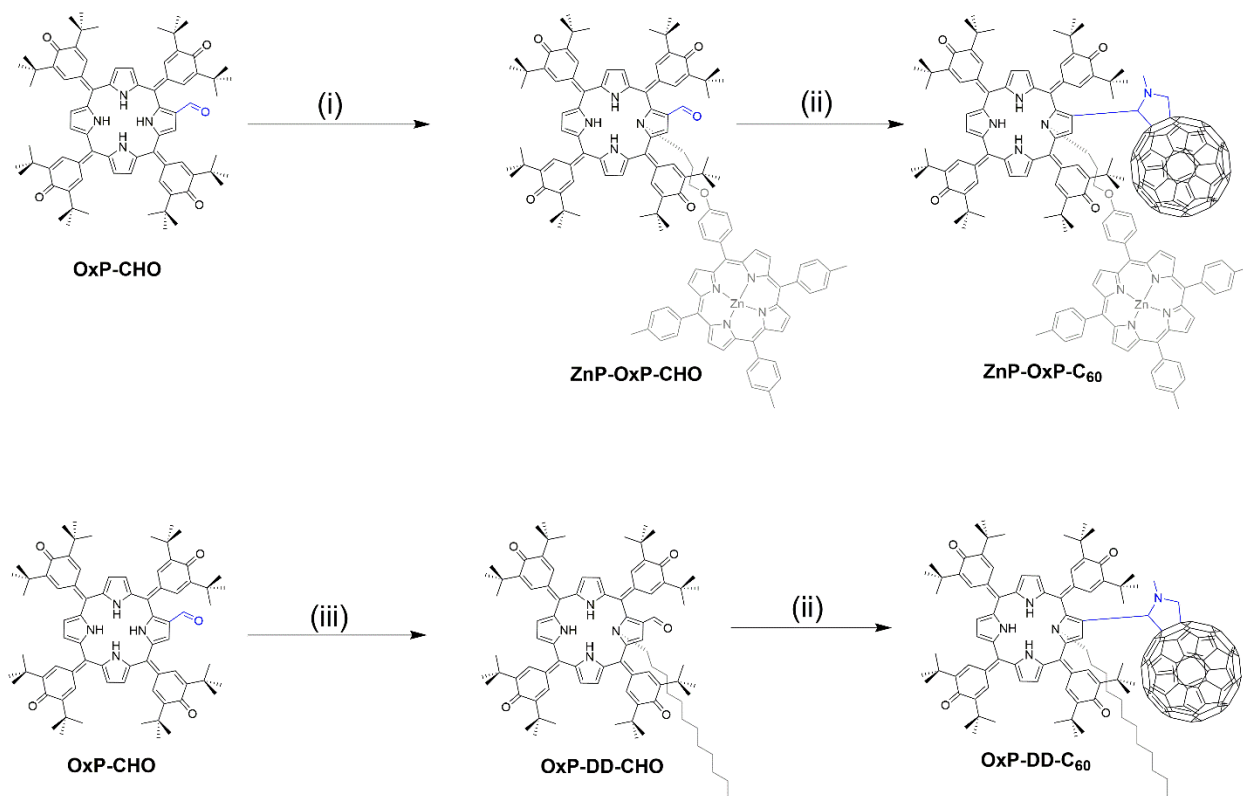

**Scheme S1.** Synthesis of the compounds. (i) [5-(4-(3-bromopropoxy)phenyl)-10,15,20-tri(4-methylphenyl)porphyrinato]zinc(II)/Na<sub>2</sub>CO<sub>3</sub>/acetone/reflux, (ii) C<sub>60</sub>/N-methylglycine/toluene/reflux, (iii) n-1-bromodecane/ K<sub>2</sub>CO<sub>3</sub>/acetone/reflux.

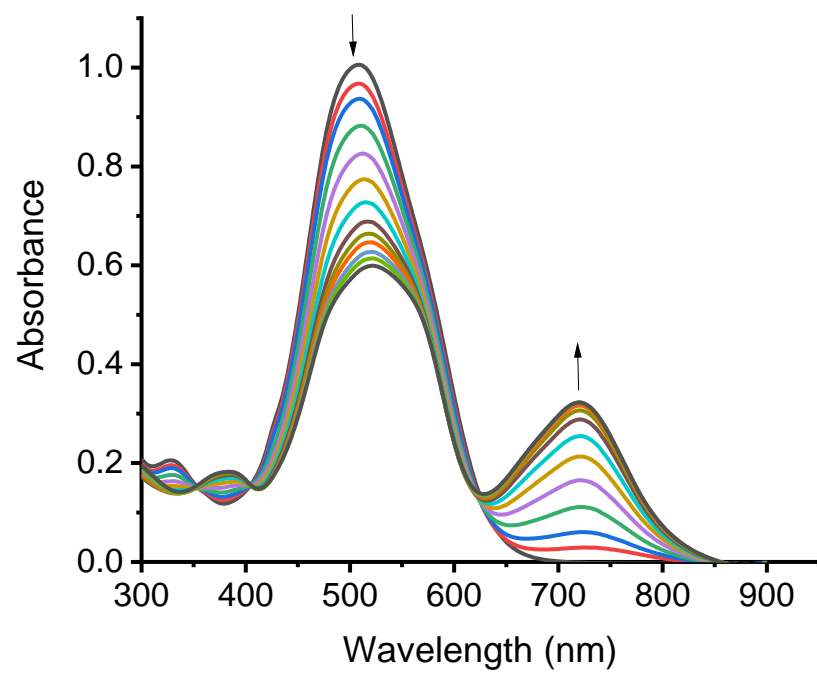

**Figure S1.** Spectral changes observed during increased addition of  $\text{NOBF}_4$  (in methanol) to a solution of **OxP** in DCB.

<sup>1</sup>H NMR spectrum of N<sub>21</sub>-dodecyl-2-formyl-5,10,15,20-tetrakis(3,5-di-*tert*-butyl-4-oxo-cyclohexa-2,5-dienylidene)porphyrinogen **OxP-DD-CHO**

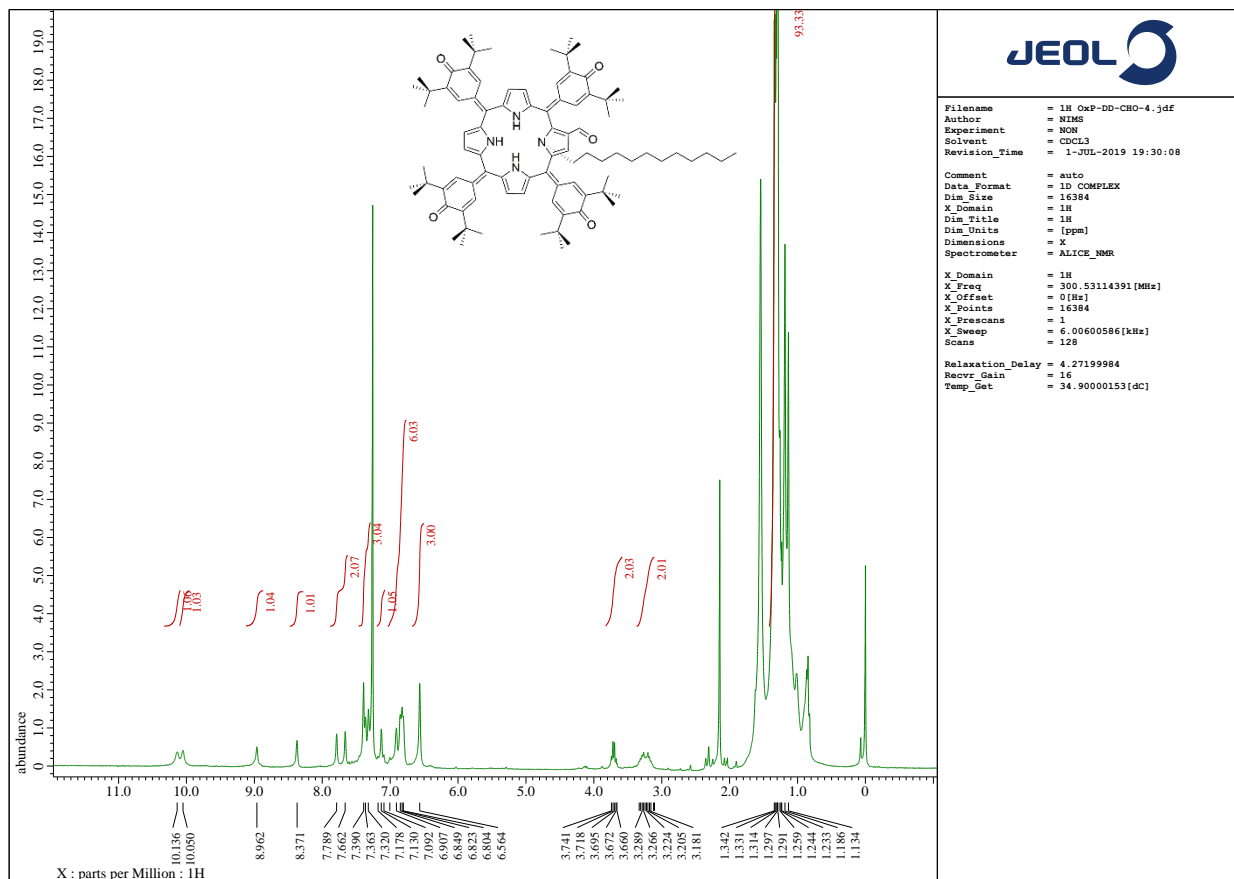

Expansion of low field region:

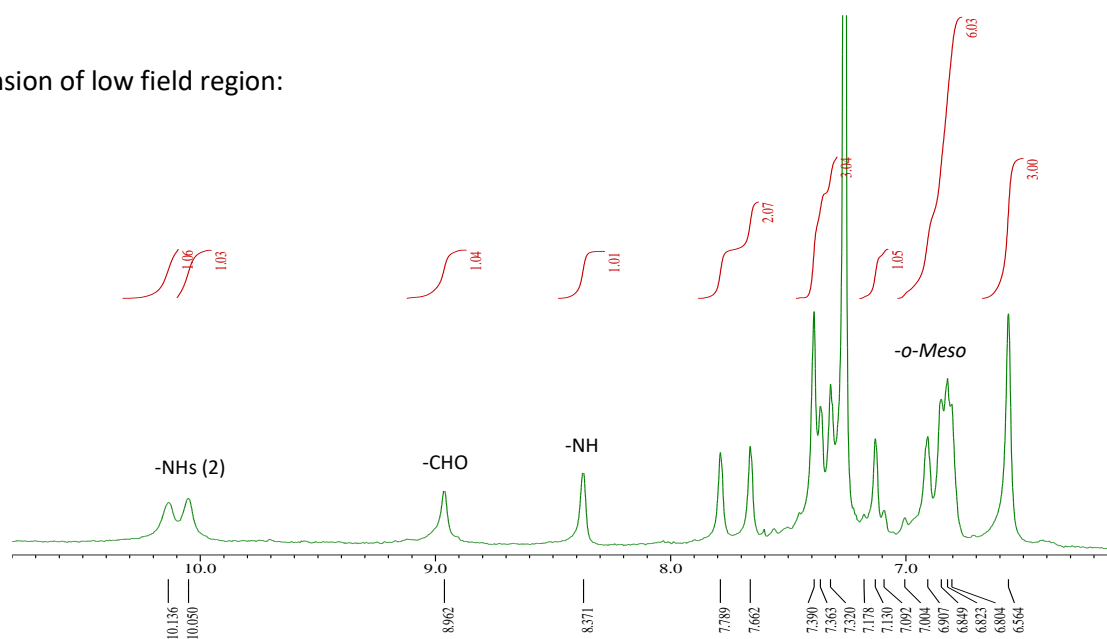

<sup>13</sup>C NMR spectrum of N<sub>21</sub>-dodecyl-2-formyl-5,10,15,20-tetrakis(3,5-di-*tert*-butyl-4-oxo-cyclohexa-2,5-dienylidene)porphyrinogen OxP-DD-CHO

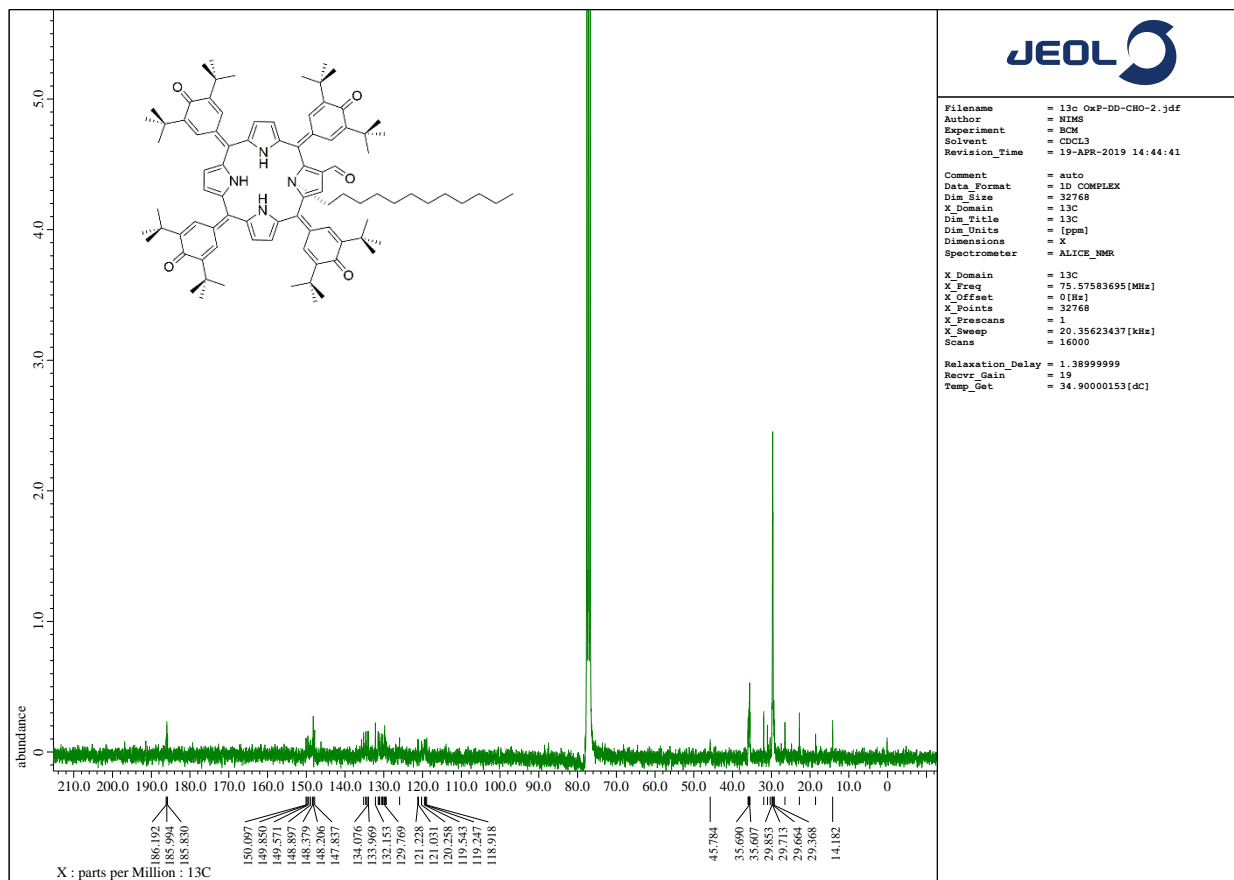

Mass spectrum of N<sub>21</sub>-dodecyl-2-formyl-5,10,15,20-tetrakis(3,5-di-*tert*-butyl-4-oxo-cyclohexa-2,5-dienylidene)porphyrinogen OxP-DD-CHO

0deg\_300min

Data: <Untitled> E10[c] 2 Jul 2019 17:38 Cal: 15 May 2006 11:45  
Shimadzu Biotech Axima CFRplus 2.9.3.20110624: Mode linear, Power: 80  
%Int. 1.0 mV[sum= 309 mV] Profiles 1-300 Unsmoothed

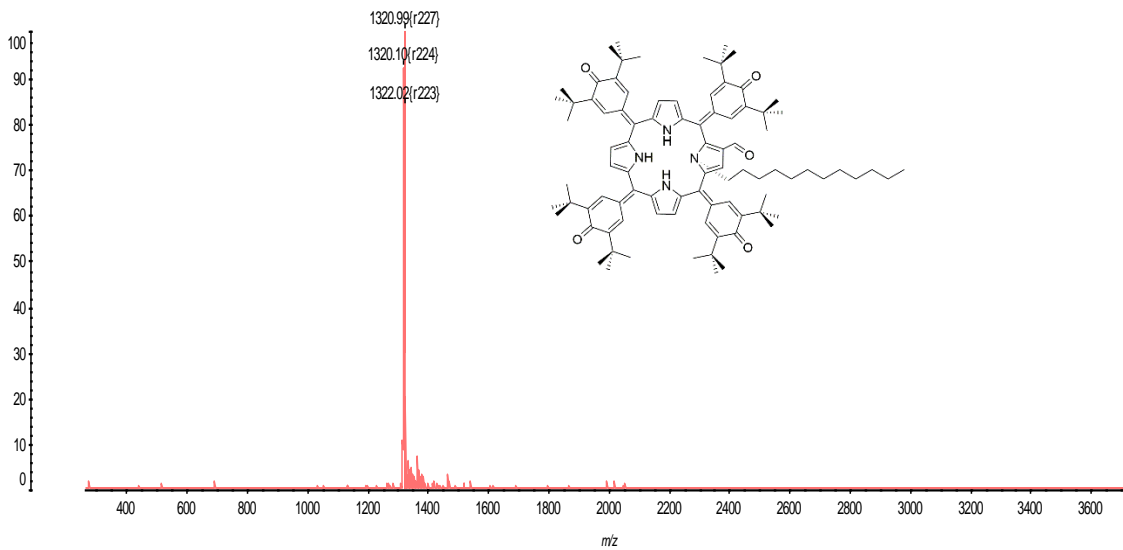

ESI-TOF-MS Spectrum of  $N_{21}$ -dodecyl-2-formyl-5,10,15,20-tetrakis(3,5-di-*tert*-butyl-4-oxo-cyclohexa-2,5-dienylidene)porphyrinogen **OxP-DD-CHO**

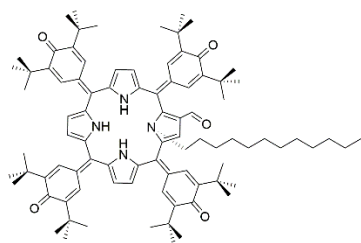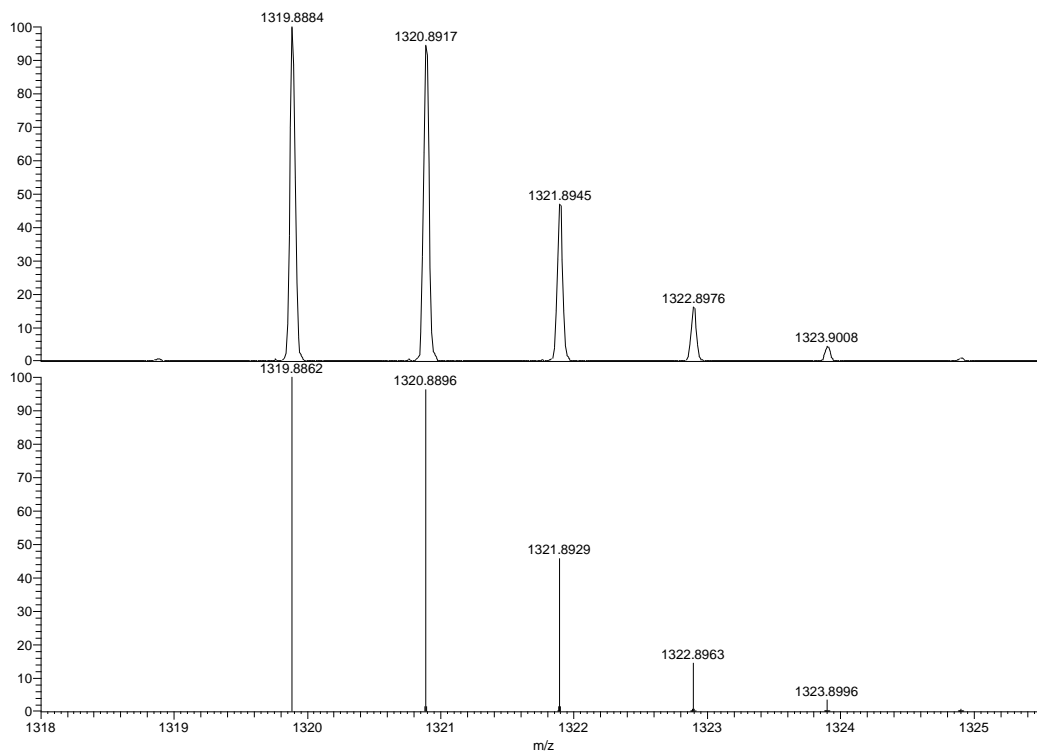

NL:  
1.91E7  
DDOxPCHO neg#1  
RT: 0.04 AV: 1 T:  
FTMS - p ESI Full  
ms  
[300.0000-  
4000.0000]

NL:  
3.69E5  
C<sub>89</sub>H<sub>115</sub>O<sub>5</sub>N<sub>4</sub>:  
C<sub>89</sub>H<sub>115</sub>O<sub>5</sub>N<sub>4</sub>  
pa Chrg 1

<sup>1</sup>H NMR spectrum of Oxp-DD-C<sub>60</sub> Dyad

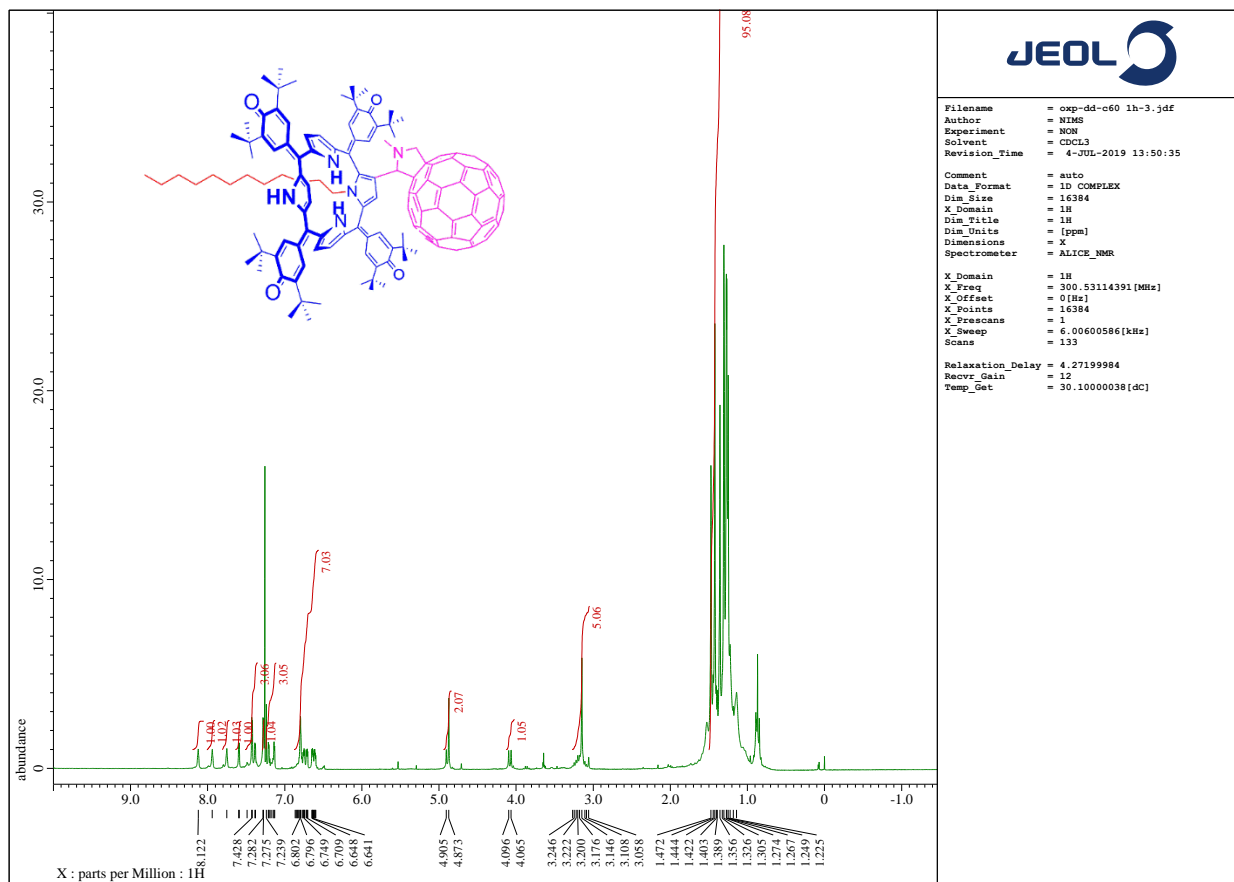

Expansion of low field region:

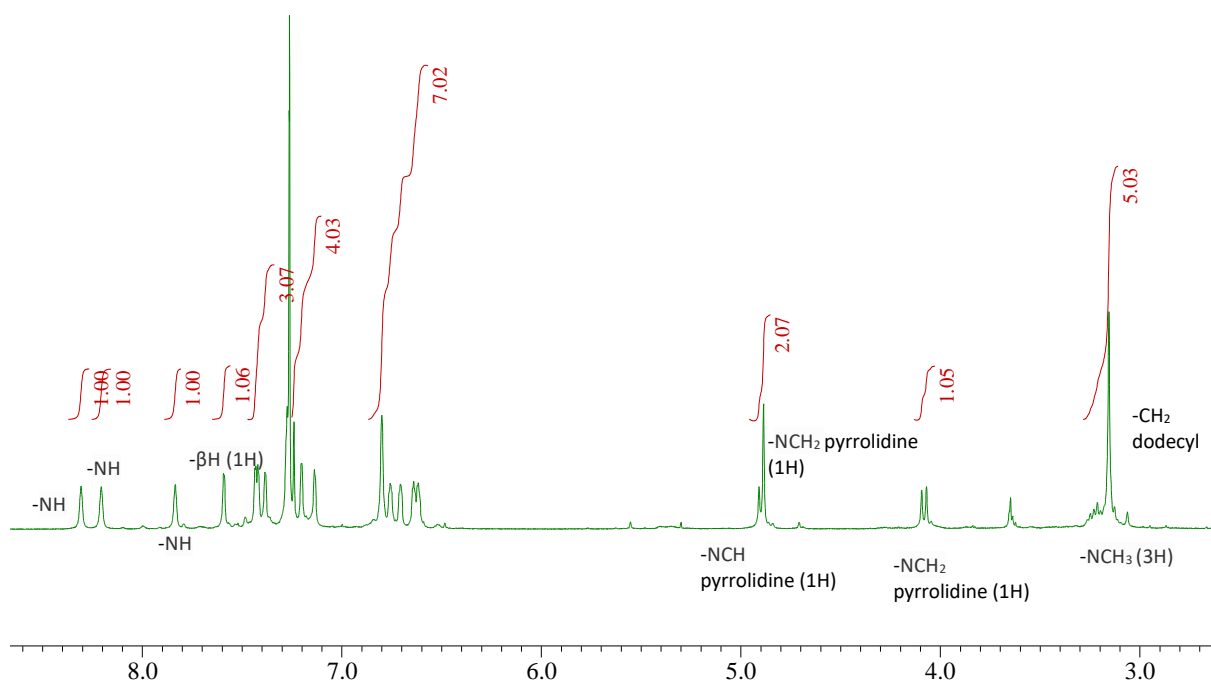



<sup>13</sup>C NMR spectrum of OxP-DD-C<sub>60</sub> Dyad

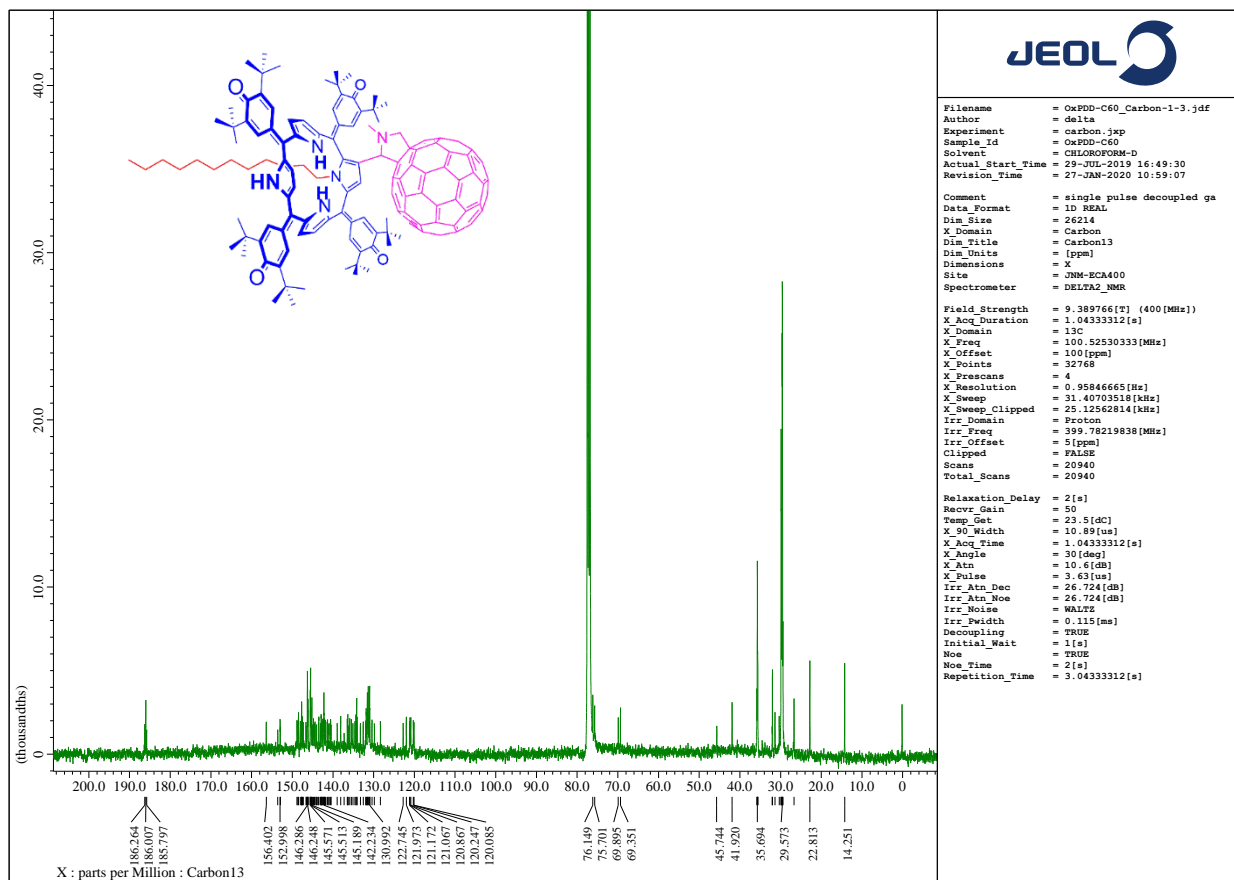

# Mass spectrum of **OxP-DD-C<sub>60</sub>** Dyad

0deg\_300min

Data: <Untitled>.115[c] 2 Jul 2019 17:47 Cal: tof  
Shimadzu Biotech Axima CFRplus 2.9.3.20110624: Mode linear, Power: 94  
%Int. 1.8 mV[sum= 287 mV] Profiles 1-161 Unsmoothed

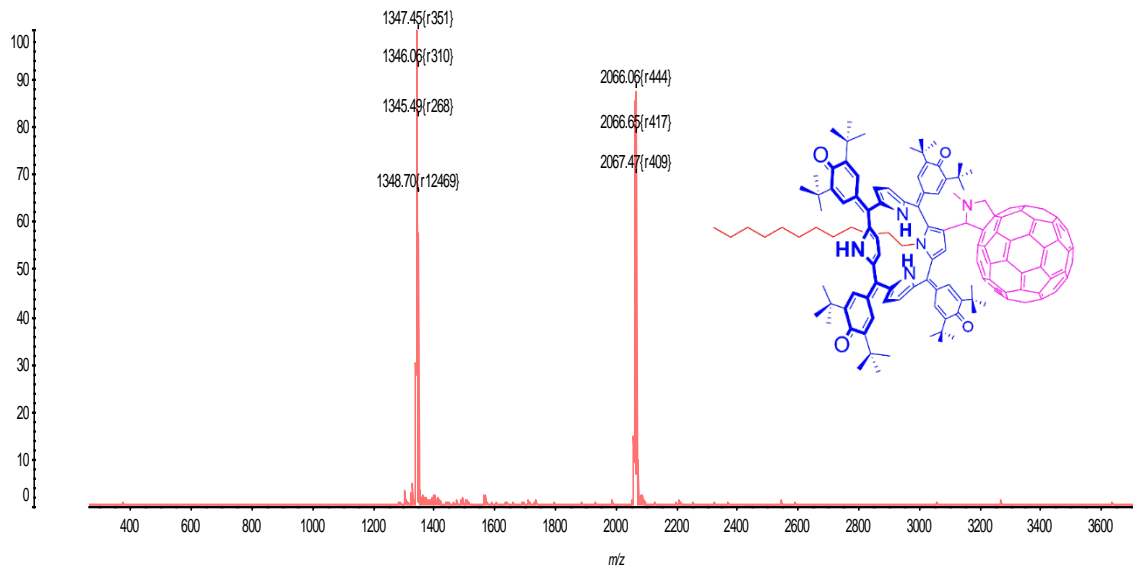

ESI-TOF-MS spectrum of **OxP-DD-C<sub>60</sub> Dyad**

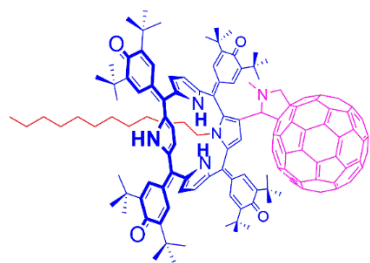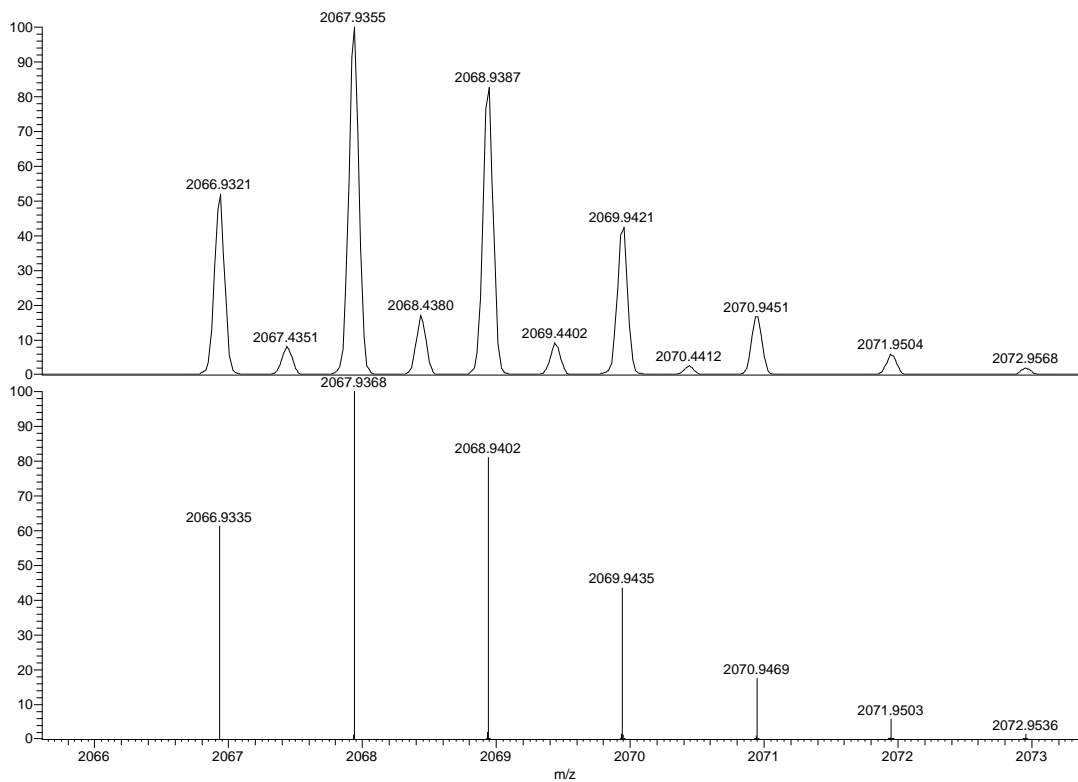

NL:  
1.86E6  
DDOxPC60 Neg#1  
RT: 0.04 AV: 1 T:  
FTMS - p ESI Full  
ms  
[300.0000-  
4000.0000]

NL:  
3.09E5  
C<sub>151</sub> H<sub>120</sub> N<sub>5</sub> O<sub>4</sub>  
C<sub>151</sub> H<sub>120</sub> N<sub>5</sub> O<sub>4</sub>  
pa Chrg 1

<sup>1</sup>H NMR spectrum of ZnP-OxP-CHO Dyad

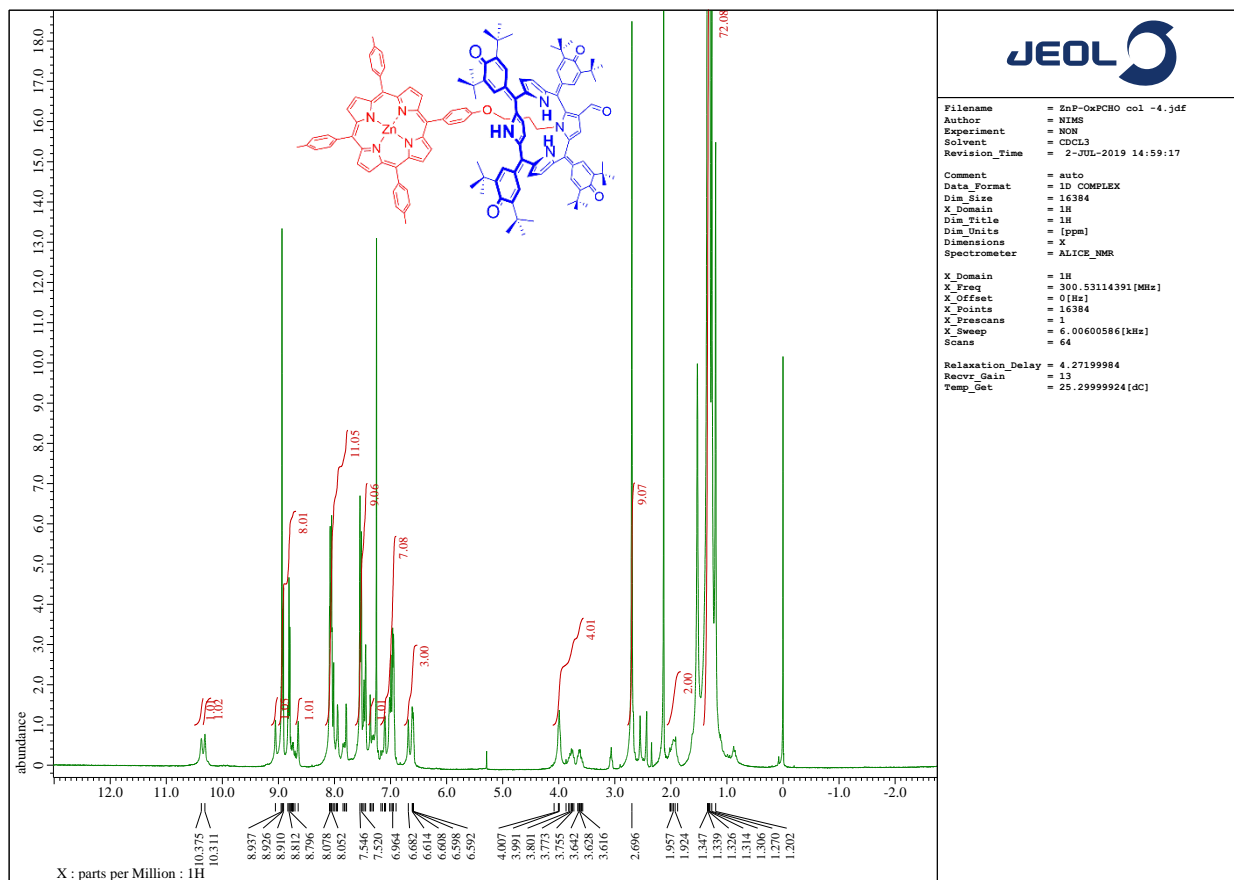

Expansion of low field region:

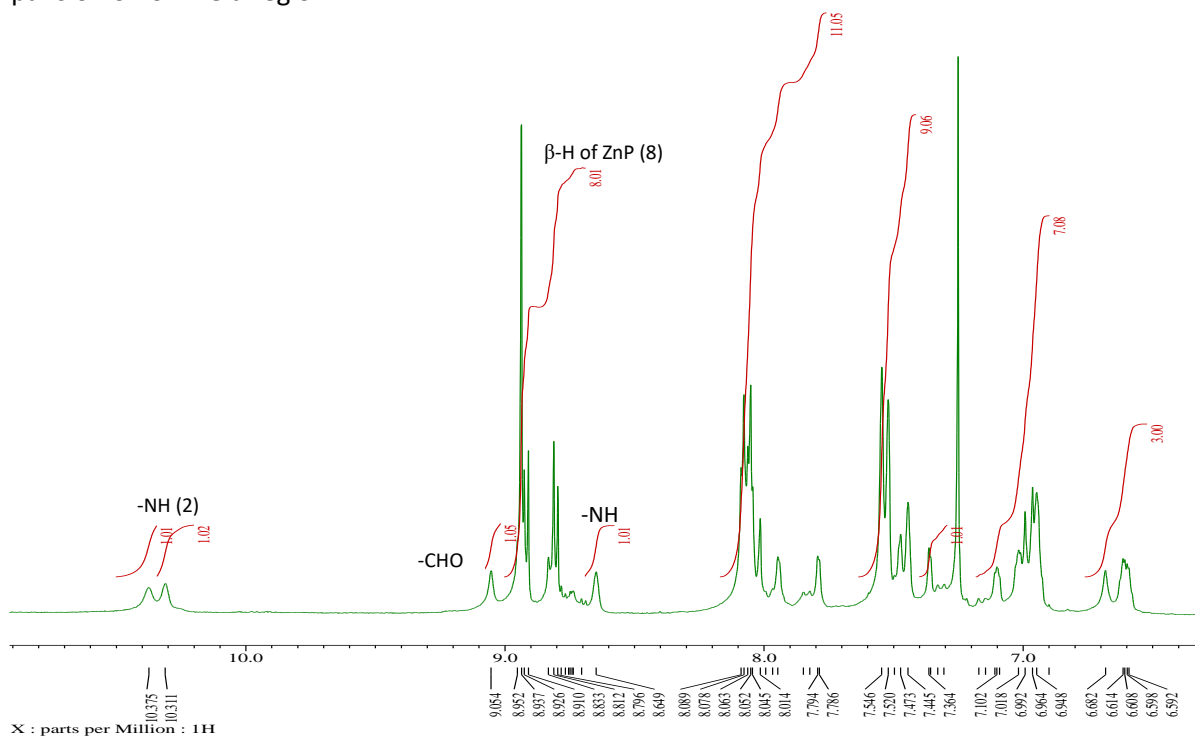

# <sup>13</sup>C NMR spectrum of ZnP-OxP-CHO Dyad

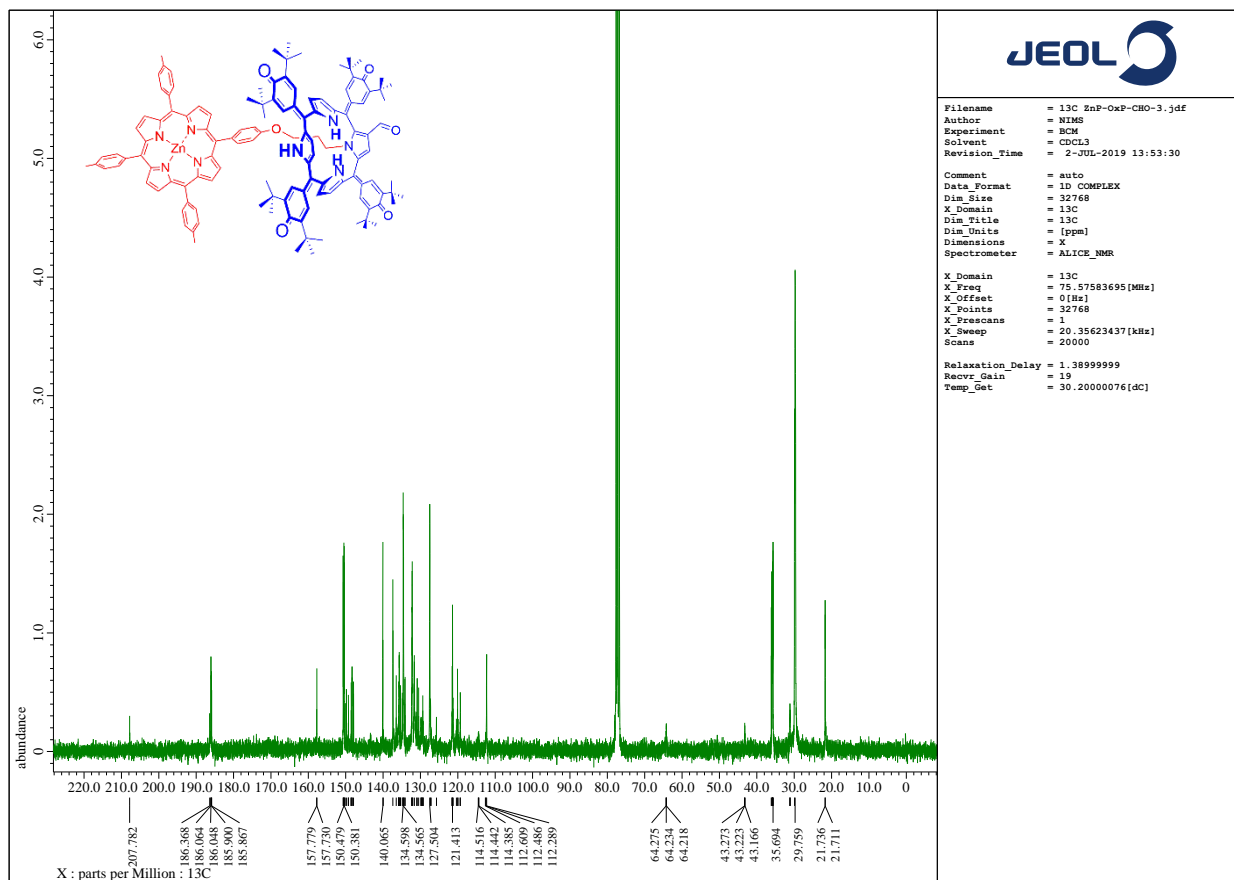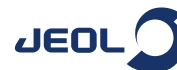

Filename = 13C ZnP-OxP-CHO-3.jdf  
Author = NIMS  
Experiment = BCM  
Solvent = CDCl3  
Revision\_Time = 2-JUL-2019 13:53:30  
Comment = auto  
Data\_Format = 1D\_COMPLEX  
Dim\_Size = 32768  
X\_Domain = 13C  
Dim\_Title = 13C  
Dim\_Units = [ppm]  
Dimensions = X  
Spectrometer = ALICE\_NMR  
X\_Domain = 13C  
X\_Freq = 75.57583695[MHz]  
X\_Offset = 0[Hz]  
X\_Points = 32768  
X\_Prescans = 1  
X\_Sweep = 20.35623437[kHz]  
Scans = 20000  
Relaxation\_Delay = 1.38999999  
Recvr\_Gain = 19  
Temp\_Get = 30.20000076[dc]

**Mass spectrum of ZnP-OxP-CHO Dyad**

0deg\_300min

Data: <Untitled>.H7[c] 24 Aug 2018 17:24 Cal: 15 May 2006 11:45  
Shimadzu Biotech Axima CFRplus 2.9.3.20110624: Mode linear, Power: 73  
%Int. 0.8 mV[sum= 138 mV] Profiles 1-166 Unsmoothed

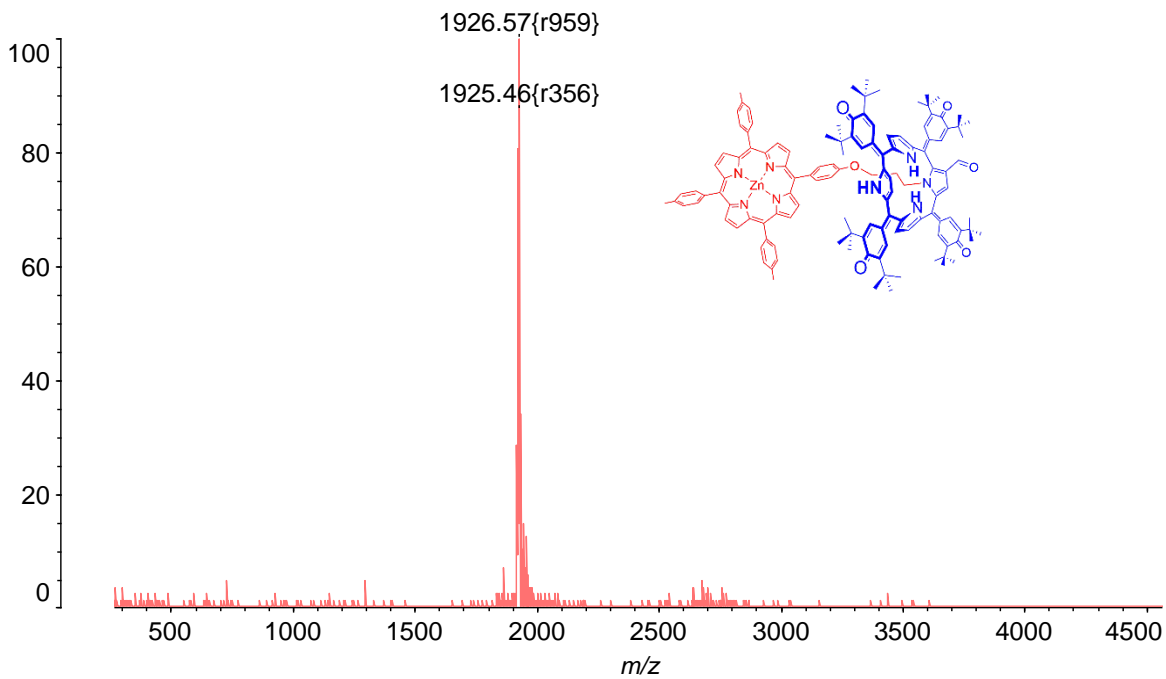

ESI-TOF-MS spectrum of ZnP-OxP-CHO Dyad

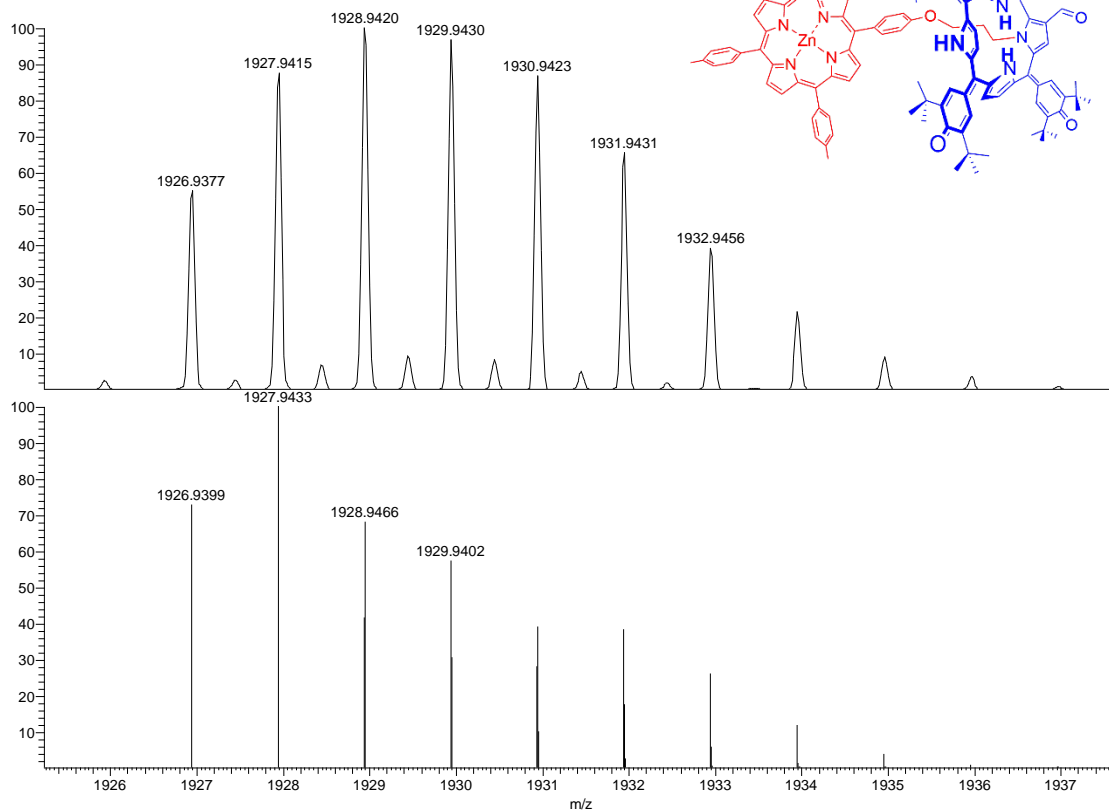

NL:  
1.55E6  
ZnPoxPCHO Pos#1  
RT: 0.04 AV: 1 T:  
FTMS + p ESI Full ms  
[400.0000-  
5000.0000]

NL:  
1.61E5  
C 127 H 130 O 6 N 8 Zn:  
C 127 H 130 O 6 N 8 Zn 1  
pa Chrg 1

# <sup>1</sup>H NMR spectrum of ZnP-OxP-C<sub>60</sub> Triad

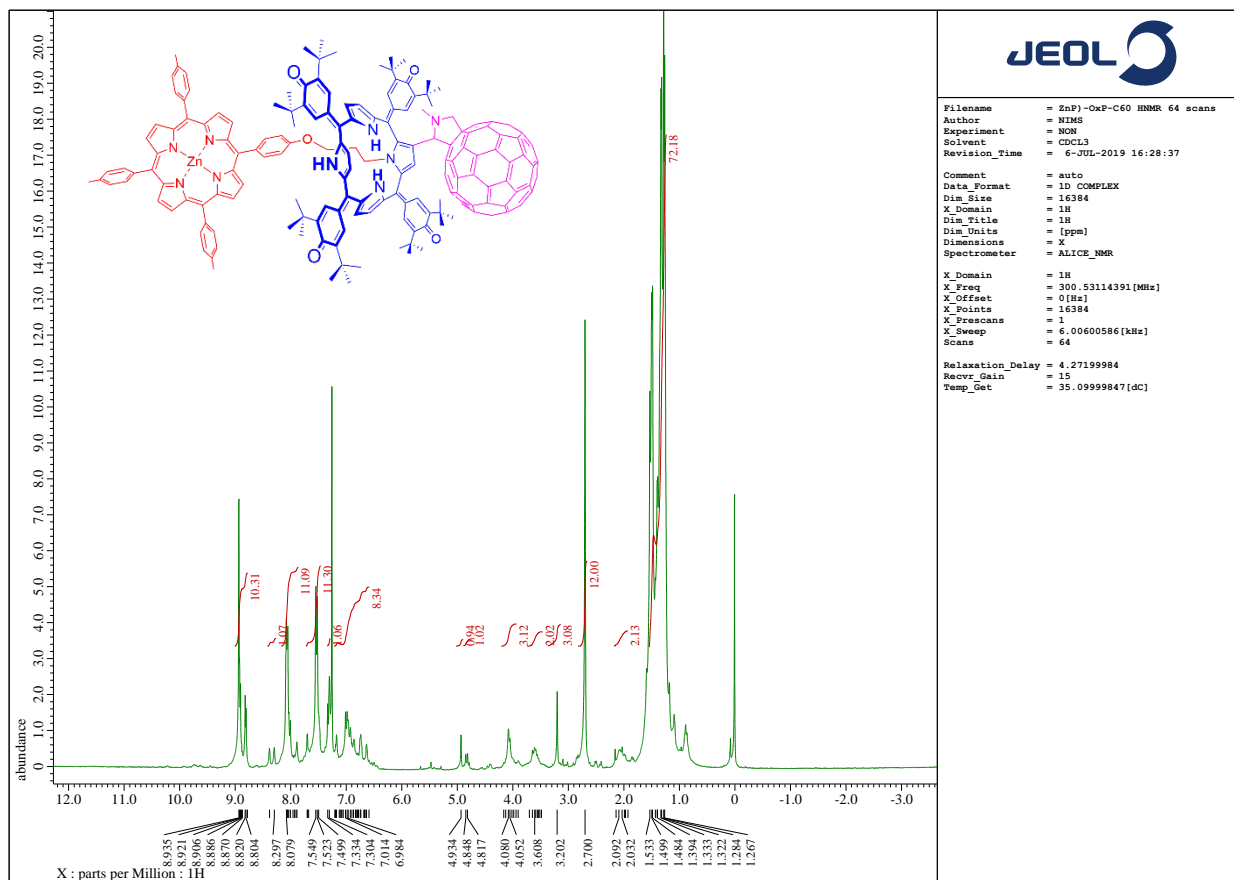

## Expansion of low field region:

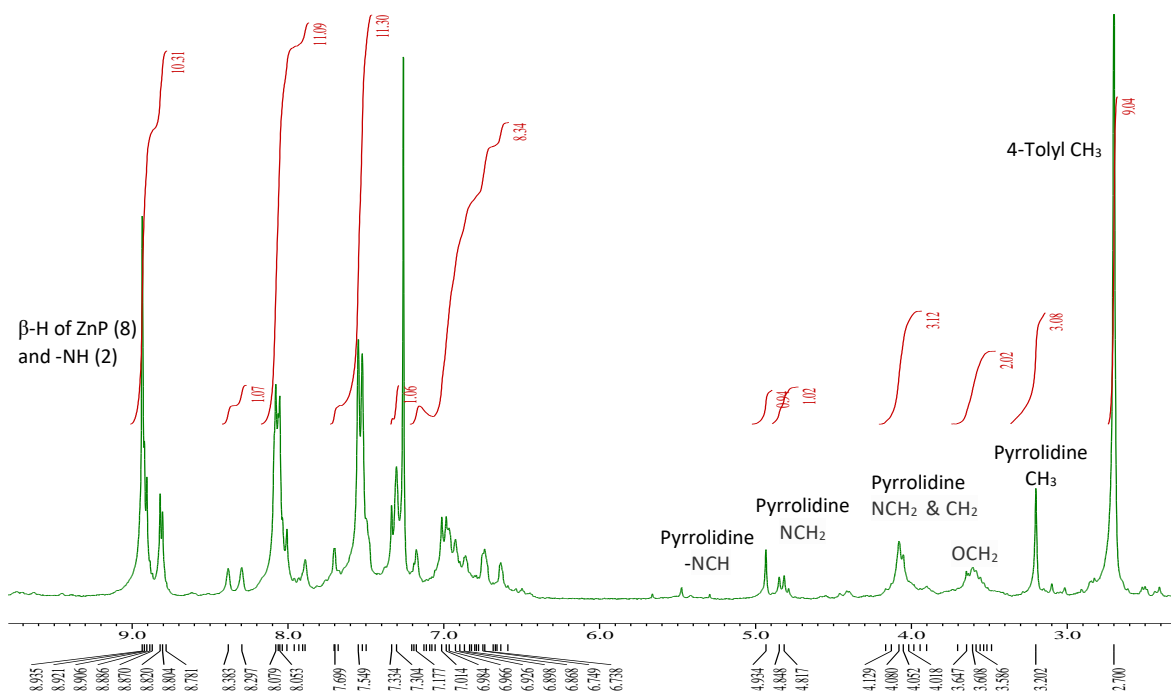



<sup>13</sup>C NMR spectrum of ZnP-OxP-C<sub>60</sub> Triad

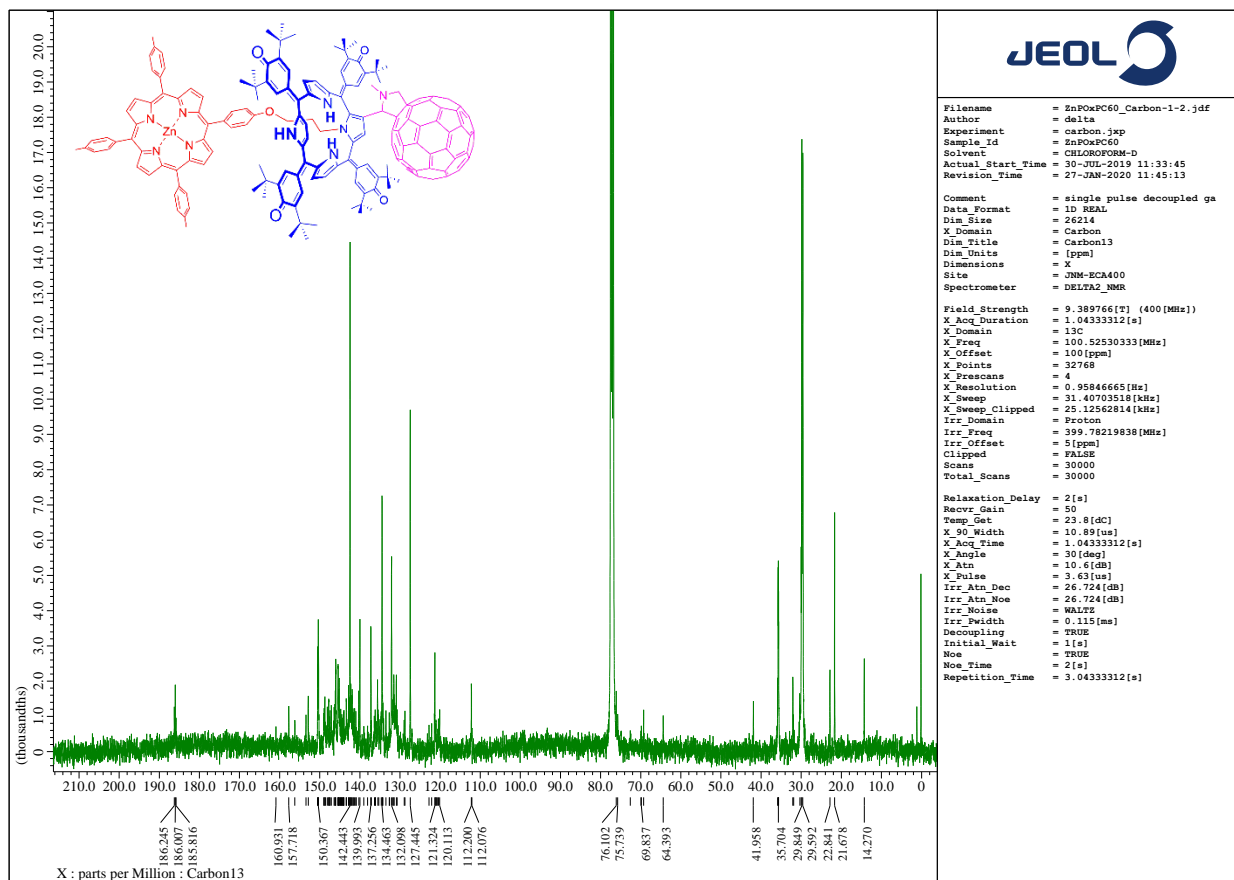

Mass spectrum of ZnP-OxP-C<sub>60</sub> Triad

Odeg\_300min

Data: znp-oxp-c600001.C3[c] 5 Jul 2018 13:37 Cal: tof 9 Dec 2015 16:54  
Shimadzu Biotech Axima CFRplus 2.9.3.20110624: Mode linear, Power: 80  
%Int. 0.8 mV[sum= 174 mV] Profiles 1-210 Unsmoothed

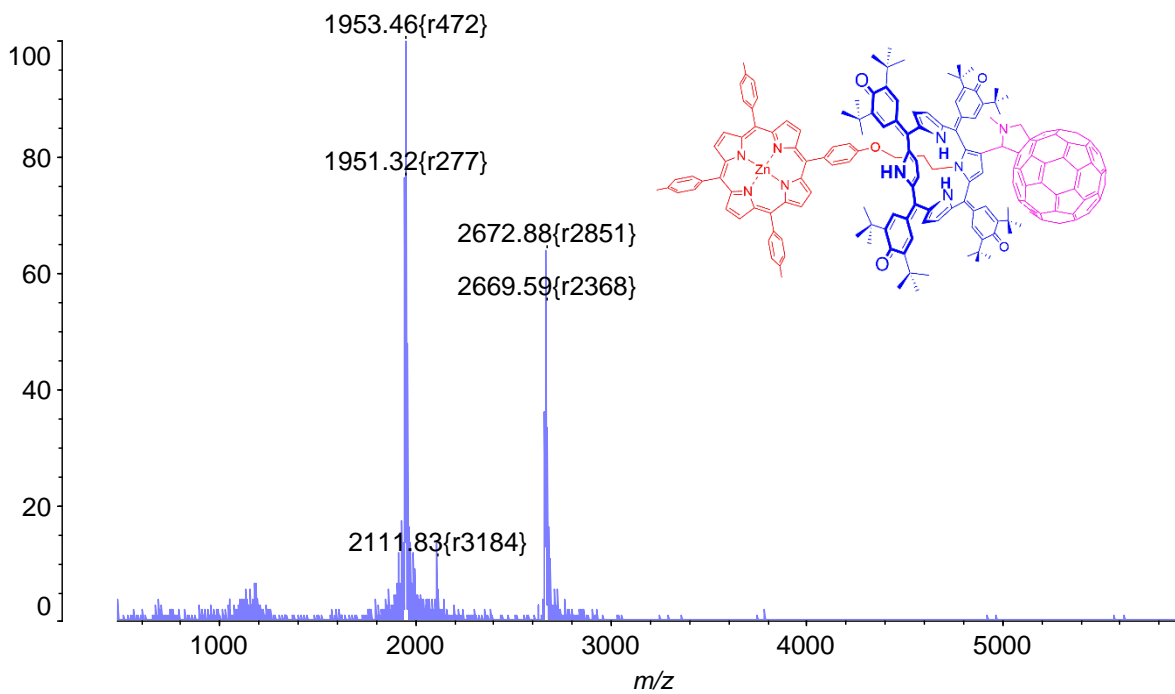

# ESI-TOF-MS spectrum of ZnP-OxP-C<sub>60</sub> Triad

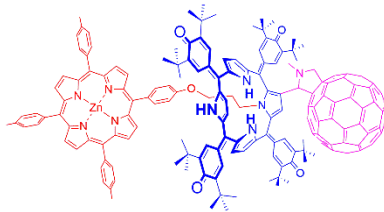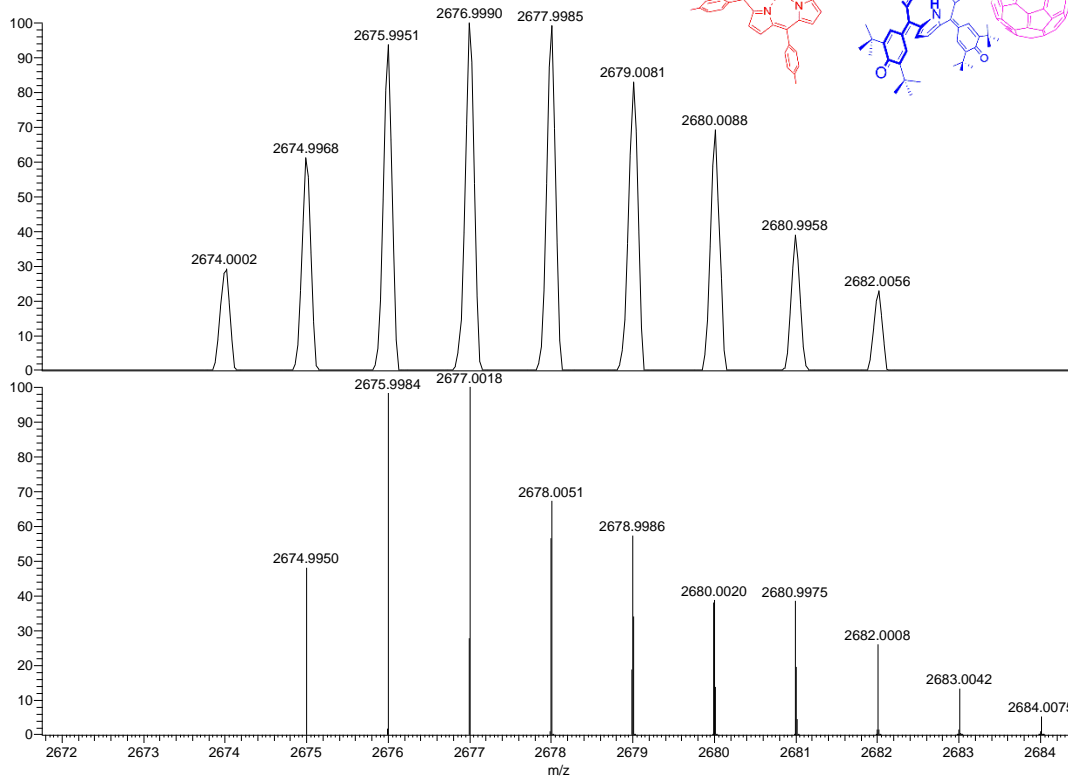

NL:  
1.29E5  
ZnP-OxP-C60 Pos#1  
RT: 0.04 AV: 1 T:  
FTMS+ p ESI Full ms  
[400.0000-  
5000.0000]

NL:  
1.24E5  
C<sub>189</sub> H<sub>136</sub> N<sub>9</sub> O<sub>5</sub> Zn:  
C<sub>189</sub> H<sub>136</sub> N<sub>9</sub> O<sub>5</sub> Zn<sub>1</sub>  
pa Chrg 1

Overlaid  $^{13}\text{C}$  NMR spectra of **ZnP-OxP-C<sub>60</sub>** Triad and **ZnP-OxP-CHO** Dyad (Shows reaction of 2-formyl group)

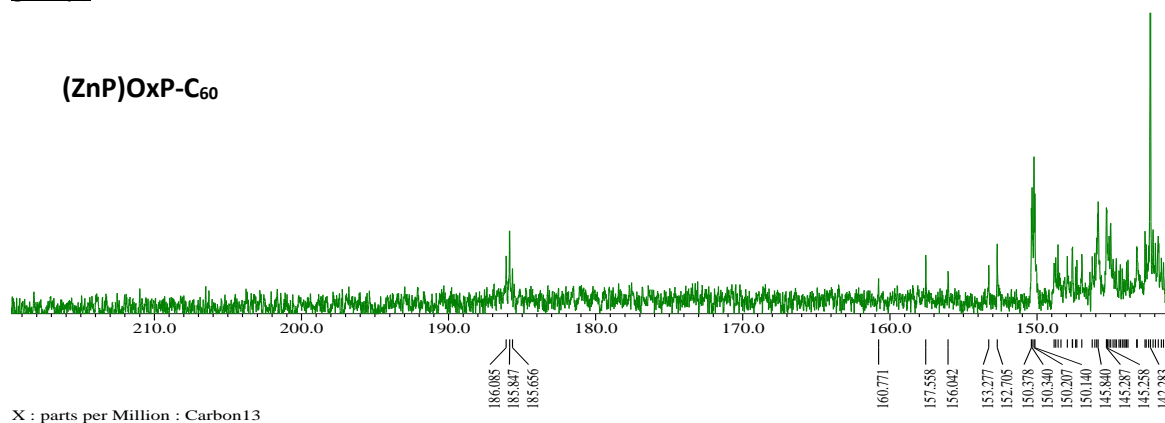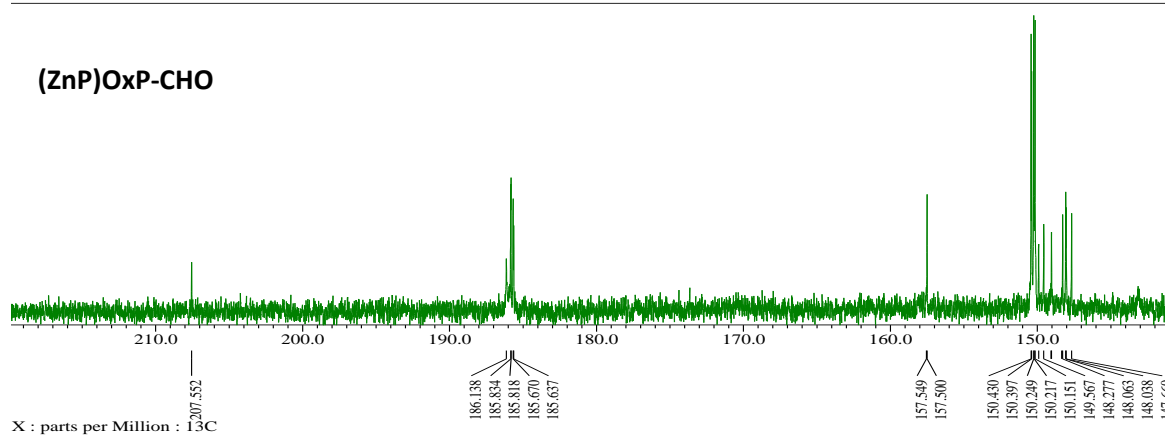

Supplement: d0cp02696d1.pdf [file d0cp02696d1.pdf]
